# Supplementary material for: Three-dimensional porous nano-Ni/Fe3O4 composite film: enhanced electrochemical performance for lithium-ion batteries
Source: Royal Society of Chemistry journal article supplement (doi:10.1039/c2jm33770c), 2012-01-01
Supplement: c2jm33770c.pdf [file c2jm33770c.pdf]

# Three-Dimensional Porous Nano-Ni/Fe<sub>3</sub>O<sub>4</sub> Composite Film: Enhanced Electrochemical Performance for Lithium Ion Batteries

Qing-qing Xiong, Jiang-ping Tu,<sup>\*</sup> Yi Lu, Jiao Chen, Ying-xia Yu, Xiu-li Wang and  
Chang-dong Gu

State Key Laboratory of Silicon Materials, Key Laboratory of Advanced Materials and Applications for Batteries of Zhejiang Province and Department of Materials Science and Engineering, Zhejiang University, Hangzhou 310027, China

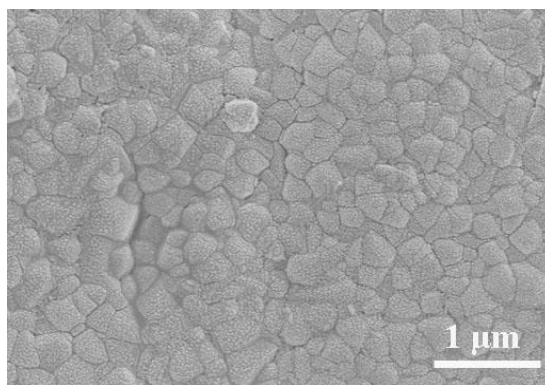

**Fig. S1** A SEM image of ordinary Fe<sub>3</sub>O<sub>4</sub> film

---

<sup>\*</sup>Corresponding Author

Tel.: +86 571 87952856. Fax: +86 571 8795 2573. E-mail: [tujp@zju.edu.cn](mailto:tujp@zju.edu.cn) (J. P. Tu)

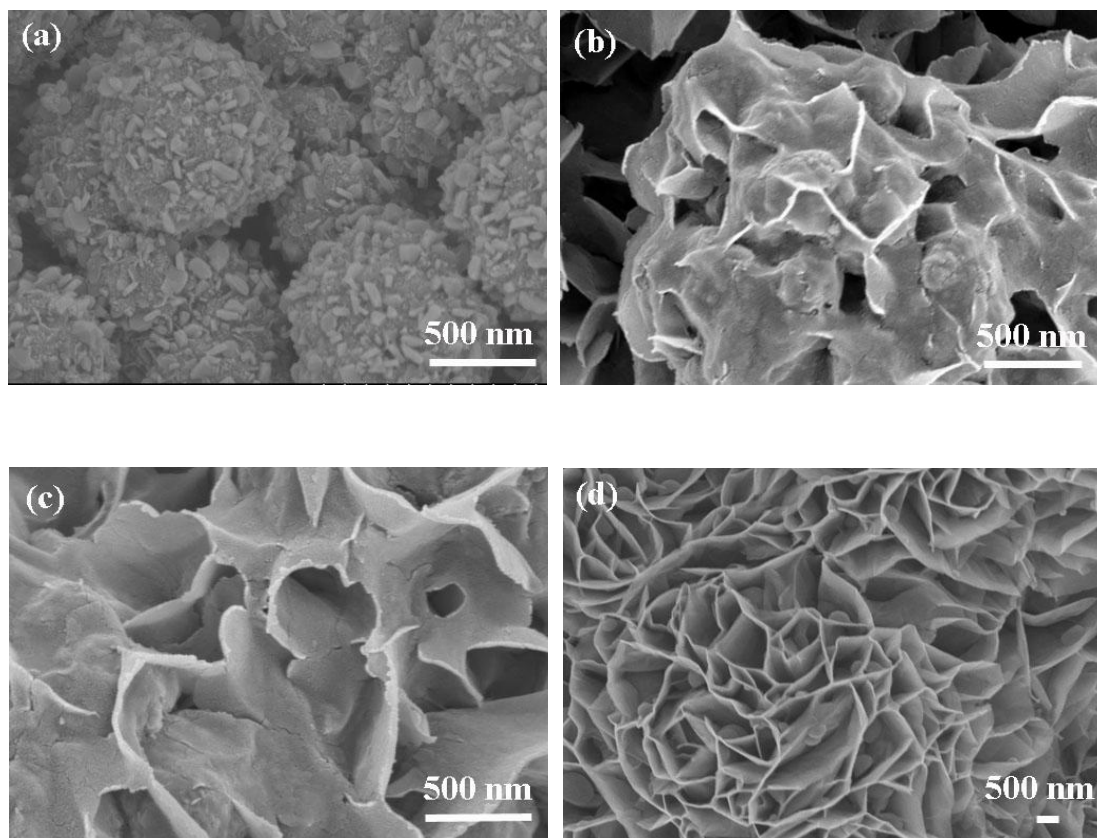

**Fig. S2** SEM images of the 3D porous nano-Ni/Fe<sub>3</sub>O<sub>4</sub> composite film obtained at different electrodeposition times: (a) 60 s, (b) 90 s, (c) 120 s, (d) 180 s

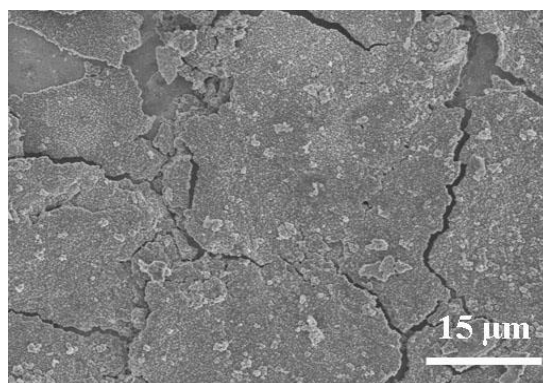

**Fig. S3** A SEM image of ordinary Fe<sub>3</sub>O<sub>4</sub> film after 50 cycles at 1 C
